# Supplementary material for: Mesoporous Silica-Layered Gold Nanorod Core@Silver Shell Nanostructures for Intracellular SERS Imaging and Phototherapy
Source: MDPI journal article supplement (doi:10.3390/pharmaceutics16010137), 2024-01-19
Supplement: s1 [file s1]

# Mesoporous Silica-Layered Gold Nanorod Core@Silver Shell Nanostructures for Intracellular SERS Imaging and Phototherapy

Sun-Hwa Seo <sup>†</sup>, Ara Joe <sup>†</sup>, Hyo-Won Han, Panchanathan Manivasagan and Eue-Soon Jang <sup>\*</sup>

Department of Applied Chemistry, Kumoh National Institute of Technology,  
Gumi 730-701, Gyeongbuk, Republic of Korea; 20126051@kumoh.ac.kr (S.-H.S.);  
manimaribtech@gmail.com (P.M.); jar@kumoh.ac.kr (A.J.); 20101414hyowon@kumoh.ac.kr (H.-  
W.H.)

<sup>\*</sup> Correspondence: euesoon@kumoh.ac.kr

<sup>†</sup> These authors contributed equally to this work.

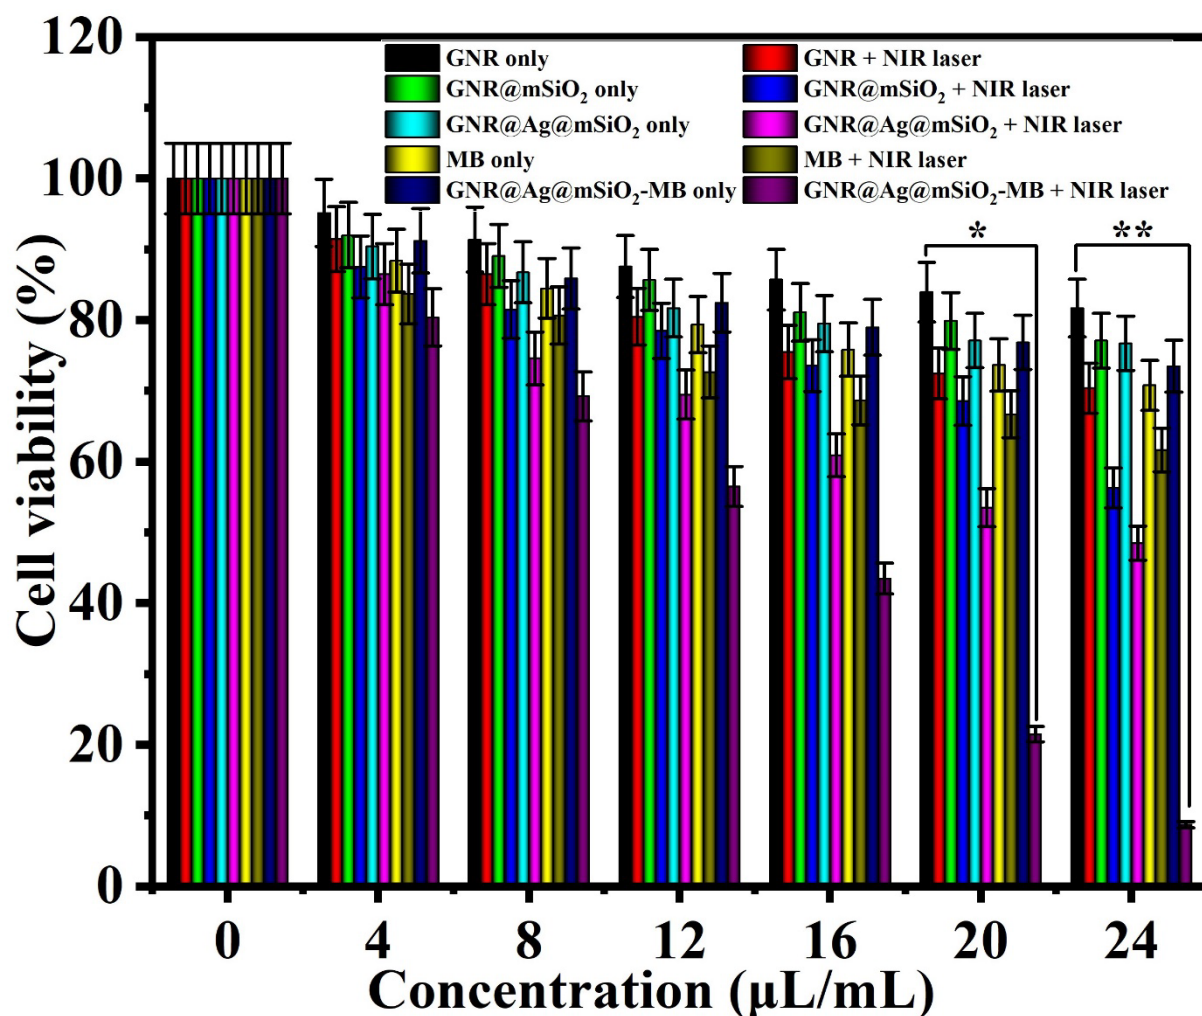

**Figure S1.** MTT assay results for CT-26 cells incubated with GNR, GNR@mSiO<sub>2</sub>, GNR@Ag@mSiO<sub>2</sub> and GNR@Ag@mSiO<sub>2</sub>-MB at various concentrations (0-24 μL of 100 μg /mL) with or without NIR laser irradiation (0.6 W/cm<sup>2</sup>) for 600 s. Data were represented as mean ± standard deviation (SD). A \*  $p < 0.05$  and \*\*  $p < 0.01$  were regarded as statistically significant.

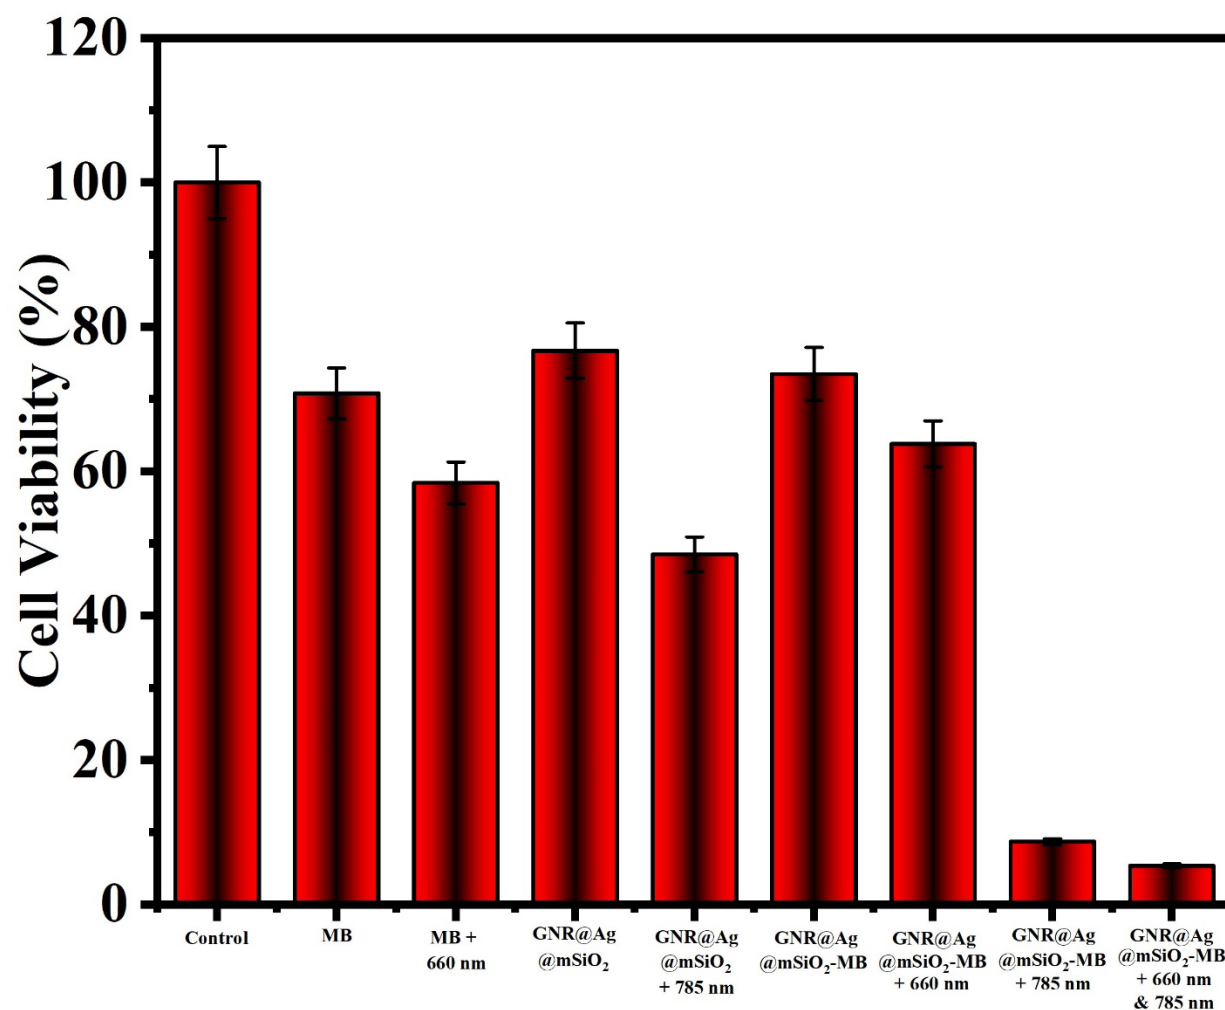

**Figure. S2.** MTT assay results for CT-26 cells incubated with GNR@Ag@mSiO<sub>2</sub>, MB, and GNR@Ag@mSiO<sub>2</sub>-MB at the same concentrations (24  $\mu$ L of 100  $\mu$ g /mL) with or without 785 nm laser (0.6 W/cm<sup>2</sup>) for 600 s or 660 nm laser (0.6 W/cm<sup>2</sup>) for 600 s or the combination of 785/660 nm two lasers irradiation (0.6 W/cm<sup>2</sup>) for 600 s. Data were represented as mean  $\pm$  standard deviation (SD).

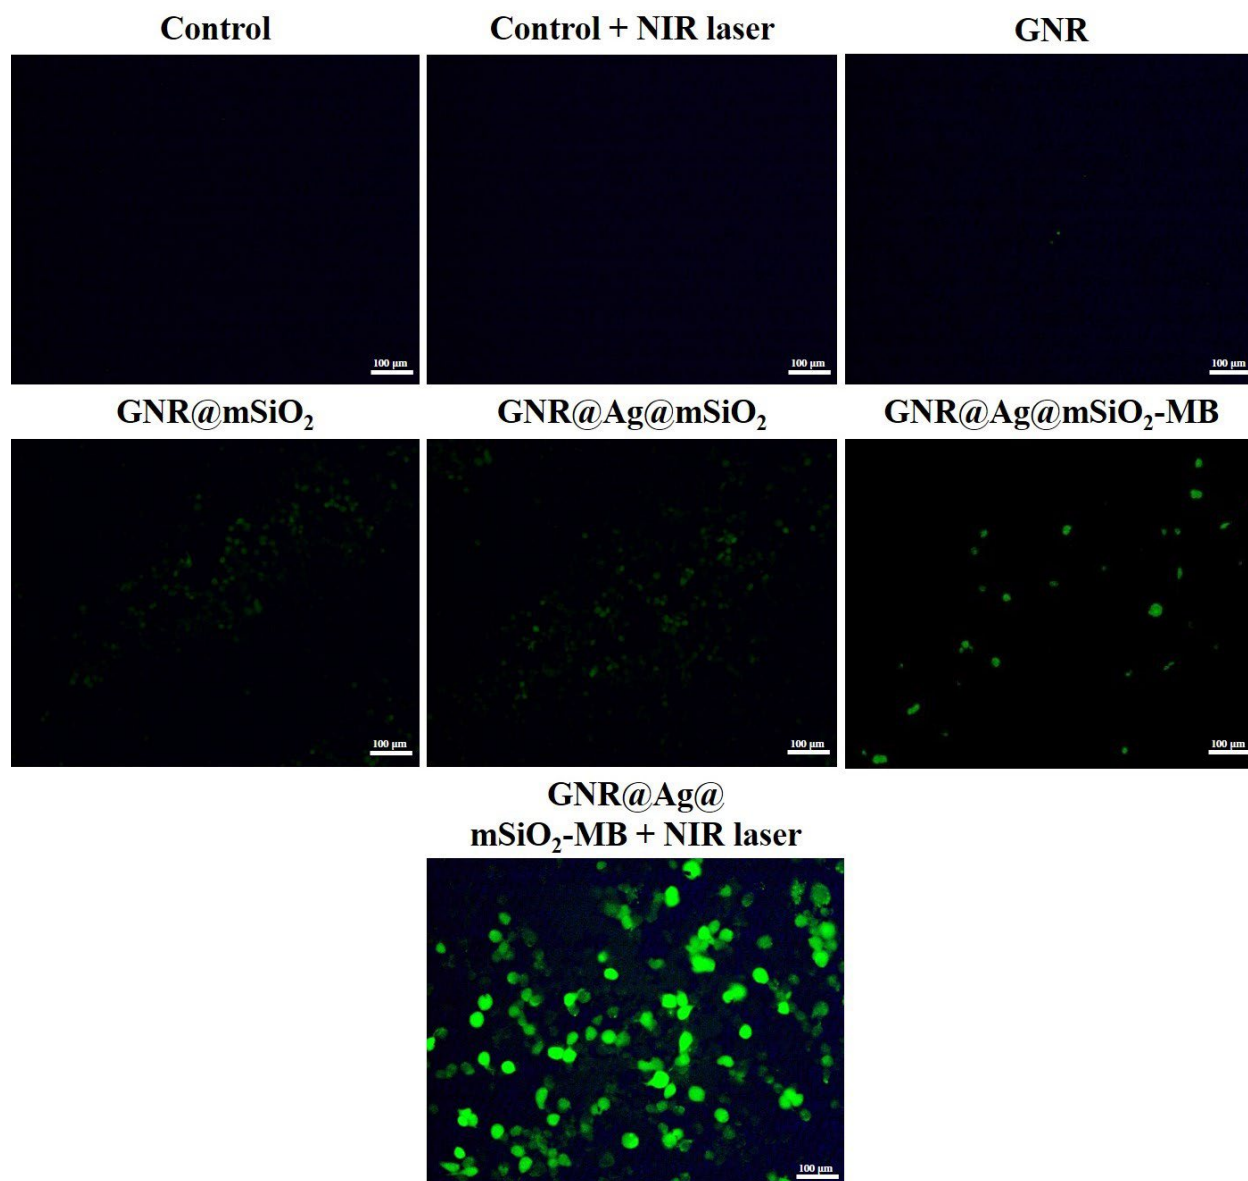

**Figure S3.** Confocal fluorescence images of ROS production in CT-26 cells stained with H<sub>2</sub>DCFDA under various treatment groups such as control, control + NIR laser, GNR only, GNR@mSiO<sub>2</sub> only, GNR@Ag@mSiO<sub>2</sub> only, GNR@Ag@mSiO<sub>2</sub>-MB only, and GNR@Ag@mSiO<sub>2</sub>-MB + NIR laser (20 × magnification; scale bar: 100 μm).
